# Supplementary material for: Interactions between Severe Allergy and Anxiety in Anti-SARS-CoV-2 Vaccinees
Source: MDPI journal article supplement (doi:10.3390/vaccines10122047), 2022-11-30
Supplement: s1 [file s1]

# Supplementary Figures

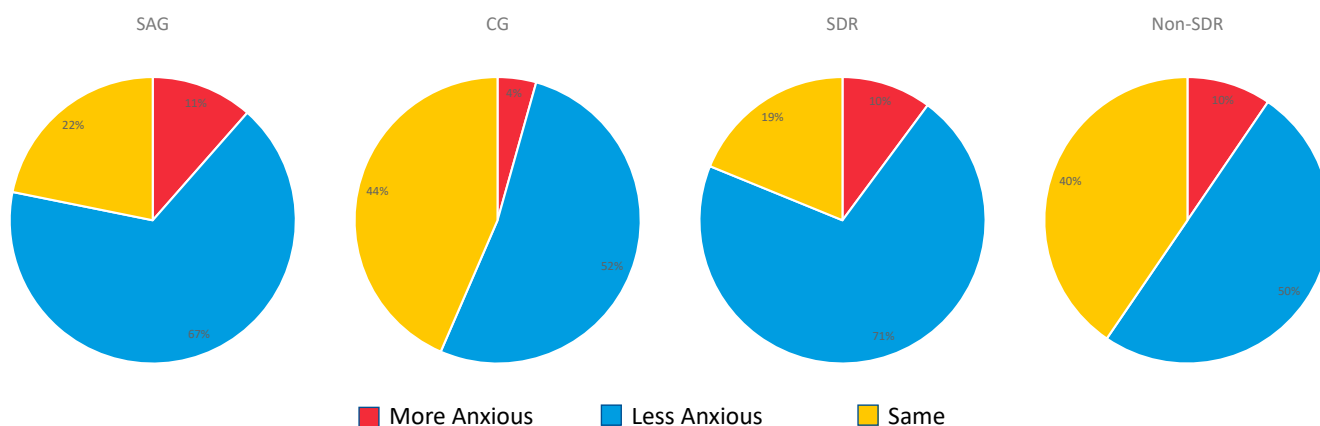

Figure S1 “Do you think that protected setting made you feel More Anxious, Less anxious or had no impact on your anxiety?” – Here are shown how patients in the different group and subgroups answered to the question about the psychological impact of the allergist-led protected setting

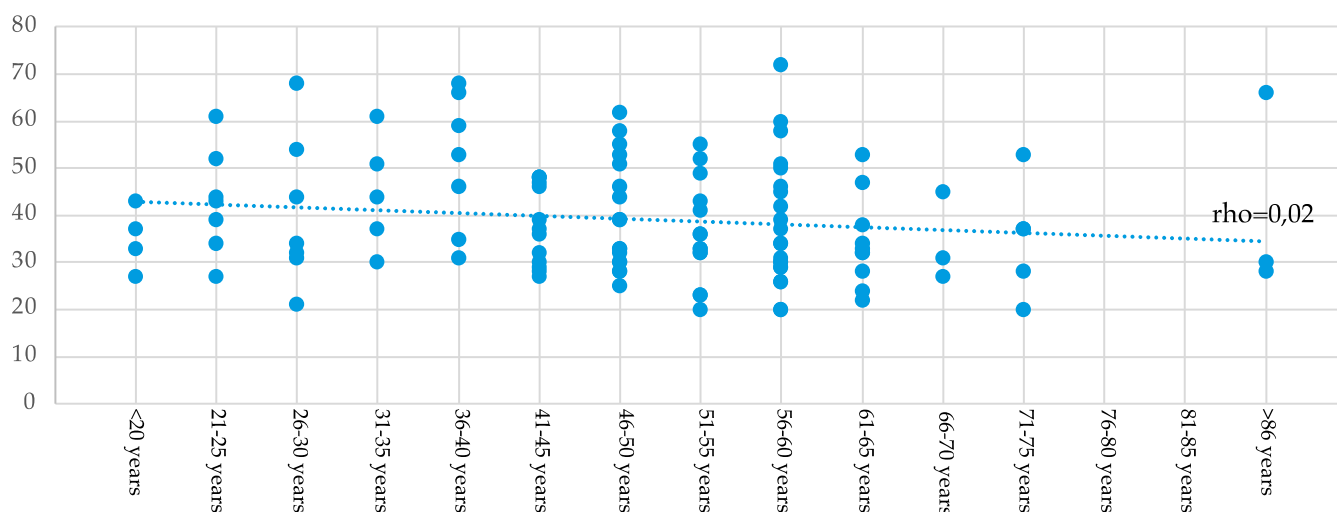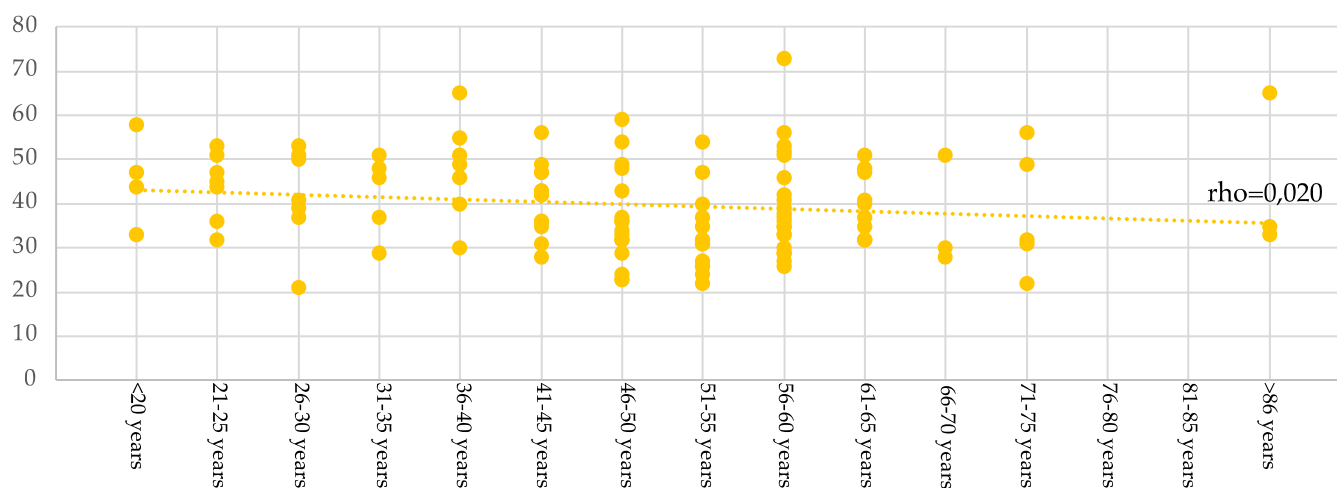

Supplementary table

|                                | Total Sample n (%) | SDR Group        | Non-SDR Group | P value |
|--------------------------------|--------------------|------------------|---------------|---------|
| n                              | 116 (100)          | 70 (60)          | 46 (40)       |         |
| Females: n (%)                 | 90 (78)            | 58 (83)          | 28 (60)       | ns      |
| Age: median (IQR)              | 47 (37-57)         | 47 (32-57)       | 47 (37-57)    | ns      |
| Drug anaphylaxis: n (%)        | 70 (60)            | 70 (79)          | 0 (0)         | p<0.001 |
| Drug HRs ≥ 2: n (%)            | 49 (42)            | 39 (56)          | 9 (20)        | p<0.001 |
| Food anaphylaxis: n (%)        | 43 (37)            | 28 (40)          | 15 (33)       | ns      |
| Allergic comorbidities: n (%)  | 75 (66)            | 47 (67)          | 28 (61)       | ns      |
| Rhinitis/conjunctivitis: n (%) | 37 (32)            | 23 (33)          | 14 (30)       | ns      |
| Asthma: n (%)                  | 33 (28)            | 18 (26)          | 15 (33)       | ns      |
| AD: n (%)                      | 33 (28)            | 23 (33)          | 10 (22)       | ns      |
| ACD: n (%)                     | 29 (25)            | 21 (30)          | 8 (17)        | ns      |
| CSU: n (%)                     | 12 (10)            | 6 (9)            | 6 (13)        | ns      |
| Food allergy: n (%)            | 47 (41)            | 29 (41)          | 18 (3)        | ns      |
| Hymenoptera allergy: n (%)     | 18 (16)            | 11 (16)          | 7 (15)        | ns      |
| Positive SPT : n (%)           | 60 (52)            | 42 (60)          | 18 (39)       | p<0.05  |
| AntiH1 therapy : n (%)         | 49 (42)            | 33 (47)          | 22 (48)       | ns      |
| Inhalatory asthma therapy      | 25 (21)            | 11 (16)          | 14 (30)       | ns      |
| Comorbidities: n (%)           | 19 (16)            | 11 (16)          | 8 (17)        | ns      |
| Dose 1: n (%)                  | 16 (14)            | 8 (11)           | 4 (15)        | ns      |
| Dose 2: n (%)                  | 46 (40)            | 29 (41)          | 17 (37)       | ns      |
| Dose 3: n (%)                  | 52 (45)            | 31 (44)          | 21 (46)       | ns      |
| Symptoms: n (%)                | 15 (13)            | 12 (17)          | 3 (6)         | ns      |
| STAI-state: median (IQR)       | 37.5 (32-48)       | 40 (32-49)       | 36 (31.5-46)  | p<0.001 |
| STAI-trait: median (IQR)       | 37.0 (32.0-48.0)   | 42.5 (32.0-51.7) | 37 (31.7-47)  | ns      |

**Supplementary Table 1.** Demographic and clinical features. Abbreviations: (HR)= Hypersensitivity reactions; (AD)= atopic dermatitis; (ACD)= allergic contact dermatitis; (CSU)= chronic spontaneous urticaria; (SPT)= Skin Prick Test; AntiH1= antiH1 antihistamine; (STAI)= State -Trait Anxiety Inventory; (IQR)= Interquartile range.

SDR= Severe Drug Reactions
